# Supplementary material
Source: publisher site journal article supplement (https://www.kjim.org/upload/media/kjim-2023-276-Supplementary-Table-2.pdf)
Supplement: Supplementary file 1 [file kjim-2023-276-Supplementary-Table-2.pdf]

**Supplementary Table 2. Proportions of participants by income and education**

| Income and education                                           | Value        |
|----------------------------------------------------------------|--------------|
| Low income and low education                                   | 1,618 (31.8) |
| Low income and high education or high income and low education | 1,461 (28.9) |
| High income and high education                                 | 1,996 (39.3) |

Values are presented as number (%).
